# Supplementary figures and images for: Perovskite as nickel catalyst precursor – impact on catalyst stability on xylose aqueous-phase hydrogenation
Source: Royal Society of Chemistry journal article supplement (doi:10.1039/c6ra13395a), 2016-01-01

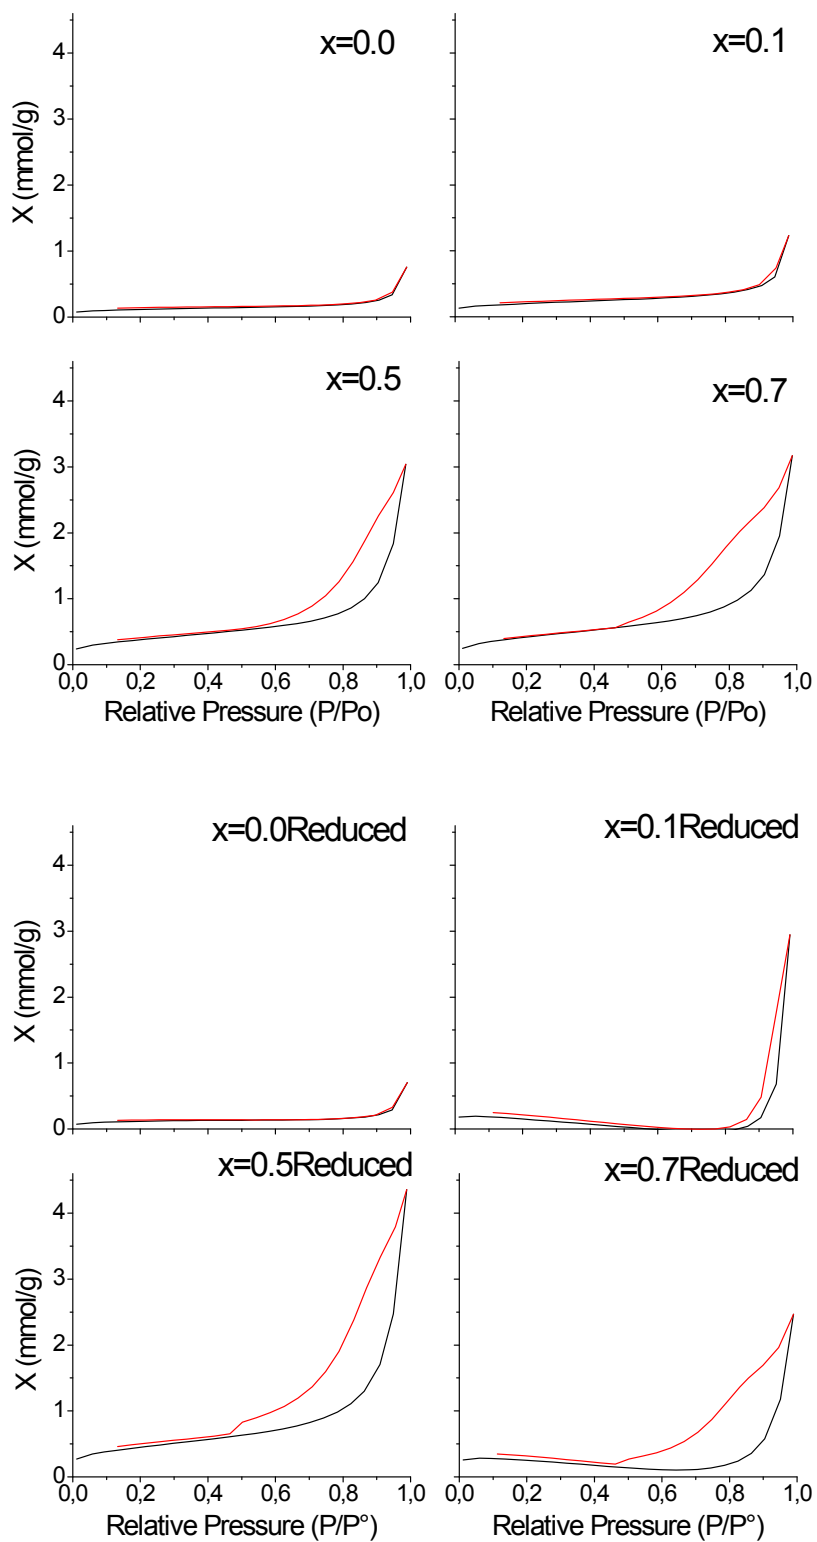

Appendix 1

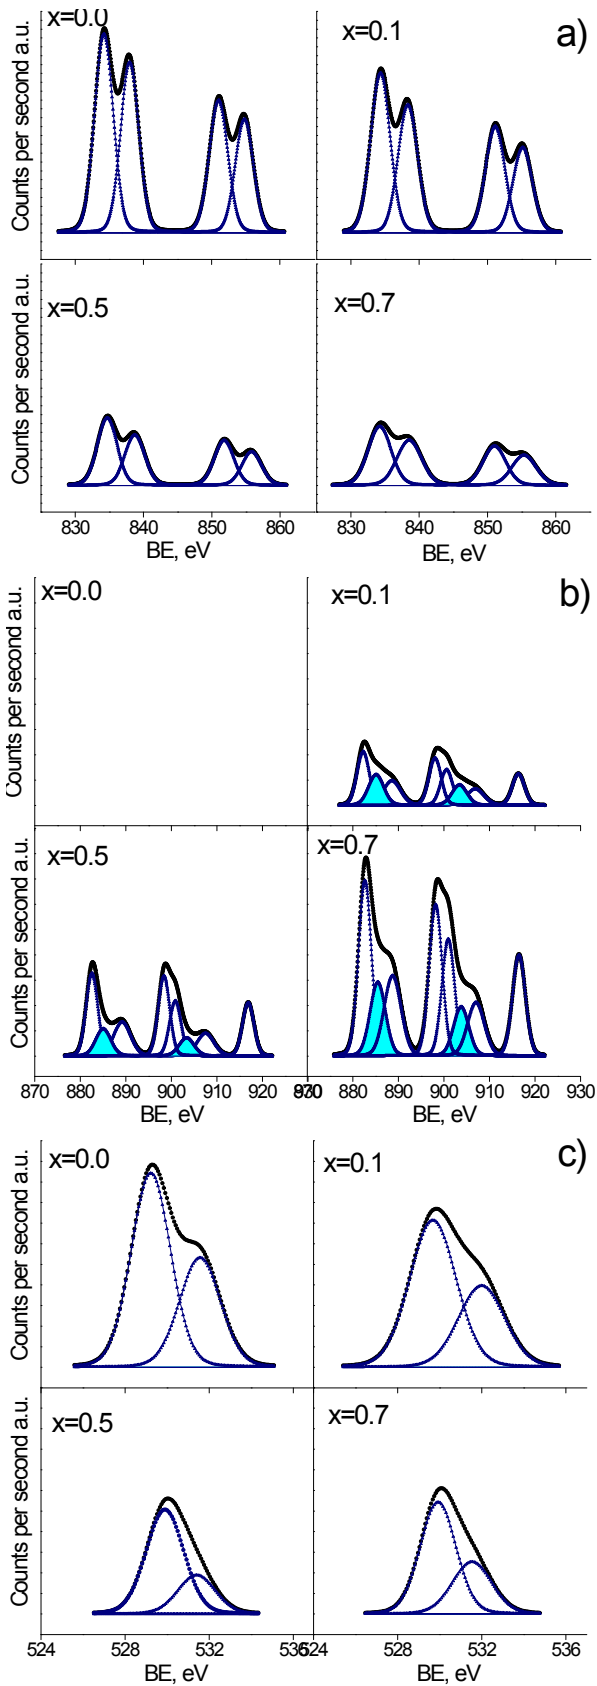

Appendix 2. a) La 3d; b) Ce 3d; c) O 1s

Supplement: c6ra13395a1.pdf [file c6ra13395a1.pdf]
